# Supplementary material for: Correlation of Clinical Parameters with Intracranial Outcome in Non-Small Cell Lung Cancer Patients with Brain Metastases Treated with Pd-1/Pd-L1 Inhibitors as Monotherapy
Source: Cancers (Basel). 2021 Mar 29;13(7):1562. doi: 10.3390/cancers13071562 (PMC8036699; doi:10.3390/cancers13071562)
Supplement: Supplementary file 1 [file cancers-13-01562-s001.pdf]

## Article

# Correlation of Clinical Parameters with Intracranial Outcome in Non-Small Cell Lung Cancer Patients with Brain Metastases Treated with Pd-1/Pd-L1 Inhibitors as Monotherapy

Konstantinos Rounis <sup>1,2,3,\*</sup>, Marcus Skribek <sup>1,2</sup>, Dimitrios Makrakis <sup>3,4</sup>, Luigi De Petris <sup>1,2</sup>, Sofia Agelaki <sup>3</sup>, Simon Ekman <sup>1,2,†</sup> and Georgios Tsakonas <sup>1,2,†</sup>

<sup>1</sup> Thoracic Oncology Center, Theme Cancer, Karolinska University Hospital, 17164 Stockholm, Sweden; marcus.skribek@ki.se (M.S.); luigi.depetris@ki.se (L.D.P.); simon.ekman@ki.se (S.E.); georgios.tsakonas@ki.se (G.T.)

<sup>2</sup> Department of Oncology-Pathology, Karolinska Institutet, 17177 Stockholm, Sweden

<sup>3</sup> Department of Medical Oncology, University General Hospital, 71110 Heraklion, Crete, Greece; dmakrak@uw.edu (D.M.); agelaki@uoc.gr (S.A.)

<sup>4</sup> Division of Oncology, University of Washington Medical School, Seattle, WA 98195, USA

\* Correspondence: kostas@rounis.gr; Tel.: +306976592930

† Equal contribution.

**Citation:** Rounis, K.; Skribek, M.; Makrakis, D.; De Petris, L.; Agelaki, S.; Ekman, S.; Tsakonas, G. Correlation of Clinical Parameters with Intracranial Outcome in Non-Small Cell Lung Cancer Patients with Brain Metastases Treated with Pd-1/Pd-L1 Inhibitors as Monotherapy. *Cancers* **2021**, *13*, x. <https://doi.org/10.3390/xxxxx>

Academic Editor: Johan Max Kros

Received: 16 February 2021

Accepted: 24 March 2021

Published: date

**Publisher's Note:** MDPI stays neutral with regard to jurisdictional claims in published maps and institutional affiliations.

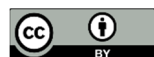

**Copyright:** © 2021 by the authors. Licensee MDPI, Basel, Switzerland. This article is an open access article distributed under the terms and conditions of the Creative Commons Attribution (CC BY) license (<http://creativecommons.org/licenses/by/4.0/>).

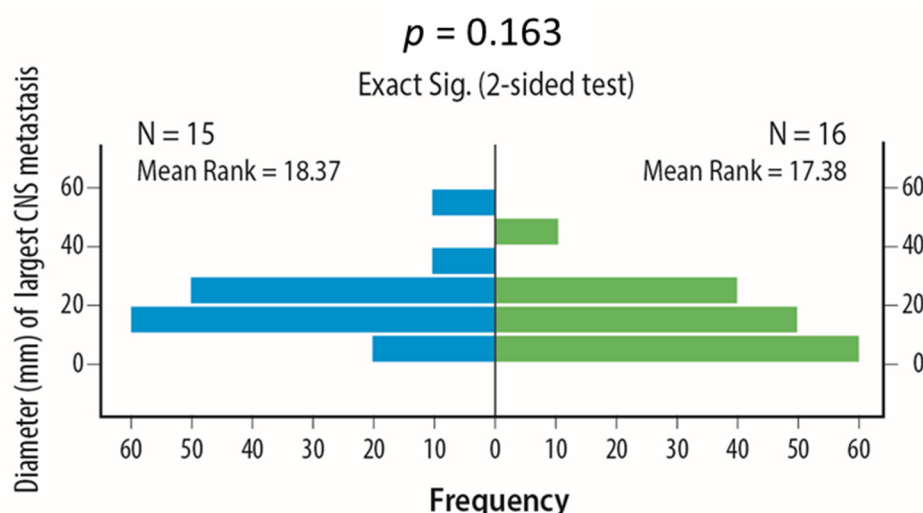

**Figure S1.** Effect of the diameter of the largest CNS metastases on IC DC rates (Mann-Whitney U test, CI 95%). On the left side is the mean diameter of the largest CNS metastases of the patients that experienced intracranial disease control and on the right side the mean diameter of the largest CNS metastases of those who developed CNS disease progression after ICI administration.

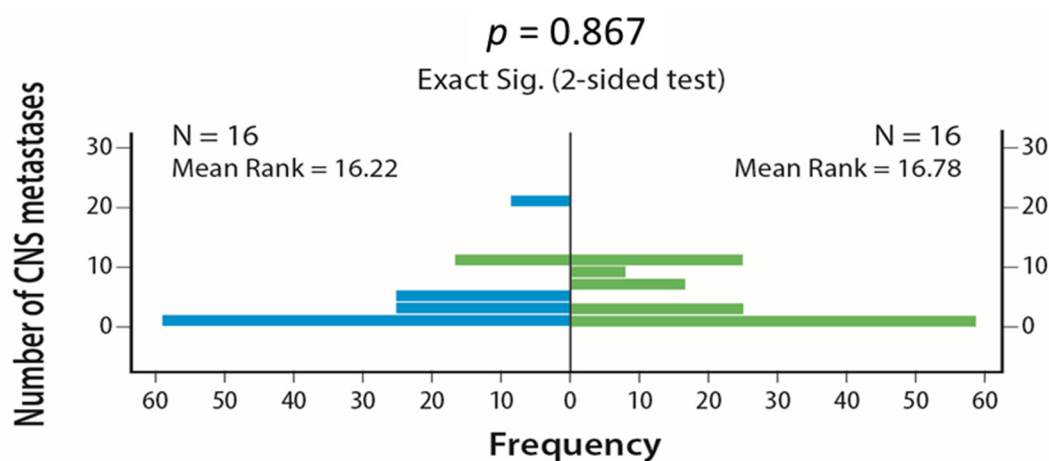

**Figure S2.** Effect of number of CNS metastases on IC DS rates (Mann-Whitney U test, CI 95%). On the left side is the mean number of CNS metastases of the patients that experienced intracranial disease stabilization and on the right side the mean number of CNS metastases of those who developed intracranial progressive disease after ICI administration.

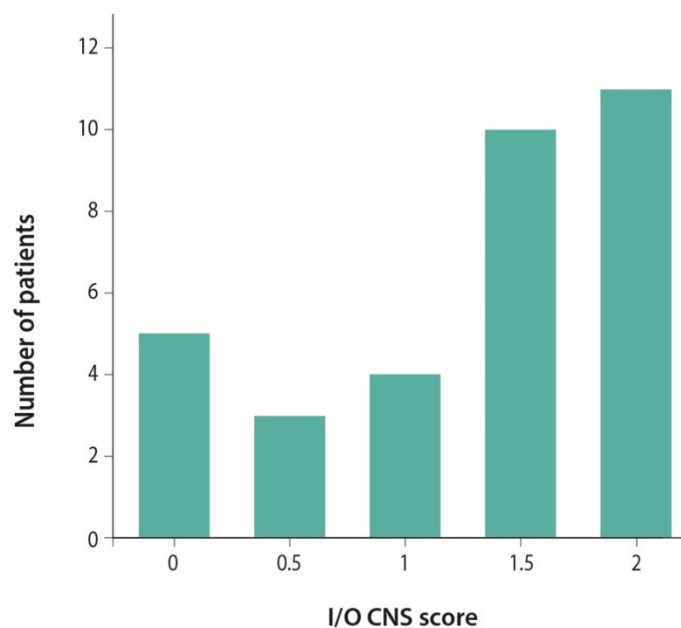

**Figure S3.** Bar plot depicting the distribution of I/O CNS score amongst the patients of our cohort.

**Table S1.** Chi-square test examining the effect of the studied parameters on intracranial disease control (PR or SD) as result of ICI administration (i stands for intracranial).

| Parameter          | Total n=33 | PRi+SDi | PDi | Pearson Chi-square Test (1-df)<br>(95% CI) |
|--------------------|------------|---------|-----|--------------------------------------------|
| Age                |            |         |     |                                            |
| <70 years old      | 20         | 13      | 7   | $p=0.019$                                  |
| >70 years old      | 13         | 3       | 10  |                                            |
| Gender             |            |         |     |                                            |
| Male               | 16         | 9       | 7   | $p=0.387$                                  |
| Female             | 17         | 7       | 10  |                                            |
| Performance status |            |         |     |                                            |
| 0-1                | 25         | 14      | 11  | $p=0.127$                                  |
| 2                  | 8          | 2       | 6   |                                            |
| Histology          |            |         |     |                                            |

|                                              |    |    |    |                 |
|----------------------------------------------|----|----|----|-----------------|
| Adenocarcinoma                               | 29 | 16 | 13 | <i>p</i> =0.038 |
| Non-adenocarcinoma                           | 4  | 0  | 4  |                 |
| PDL1 levels in extracranial lesions          |    |    |    |                 |
| <50%                                         | 12 | 9  | 3  | <i>p</i> =0.018 |
| ≥50%                                         | 14 | 4  | 10 |                 |
| Disease burden                               |    |    |    |                 |
| 1-2 organs with metastases                   | 13 | 5  | 8  | <i>p</i> =0.353 |
| >2 organs with metastases                    | 20 | 11 | 9  |                 |
| Primary CNS metastases at diagnosis          |    |    |    |                 |
| Yes                                          | 24 | 15 | 9  | <i>p</i> =0.011 |
| No                                           | 9  | 1  | 8  |                 |
| Number of CNS metastases                     |    |    |    |                 |
| ≤3                                           | 21 | 10 | 11 | <i>p</i> =0.895 |
| >3                                           | 12 | 6  | 6  |                 |
| Size of largest CNS metastasis               |    |    |    |                 |
| ≤20mm                                        | 19 | 8  | 11 | <i>p</i> =0.379 |
| >20mm                                        | 12 | 7  | 5  |                 |
| Neurological symptoms due to CNS metastases  |    |    |    |                 |
| Yes                                          | 18 | 10 | 8  | <i>p</i> =0.373 |
| No                                           | 15 | 6  | 9  |                 |
| Previous RT for CNS metastases               |    |    |    |                 |
| Yes                                          | 18 | 12 | 6  | <i>p</i> =0.022 |
| No                                           | 15 | 4  | 11 |                 |
| CNS response to previous systemic treatment* |    |    |    |                 |
| PRi+SDi                                      | 7  | 7  | 0  | <i>p</i> =0.002 |
| PDi                                          | 21 | 7  | 14 |                 |
| Active BM                                    |    |    |    |                 |
| Yes                                          | 25 | 8  | 17 | <i>p</i> =0.001 |
| No                                           | 8  | 8  | 0  |                 |
| Line of treatment                            |    |    |    |                 |
| 1 <sup>st</sup>                              | 5  | 1  | 4  | <i>p</i> =0.166 |
| 2 <sup>nd</sup> or subsequent                | 28 | 15 | 13 |                 |
| Steroids use > 10 mg for ≥ 10 days           |    |    |    |                 |
| Yes                                          | 16 | 6  | 10 | <i>p</i> =0.221 |
| No                                           | 17 | 10 | 7  |                 |
